# Supplementary material for: Reconstructing DNA copy number by joint segmentation of multiple sequences
Source: PubMed Central journal article supplement (PMC3534631; doi:10.1186/1471-2105-13-205), 2012-08-16
Supplement: 1471-2105-13-205-S2.pdf [file 1471-2105-13-205-S2.pdf]

**Table S1. Regions of allelic imbalance imposed to the HapMap sample NA06991<sup>a</sup>**

| Region                                        | Aberration Type <sup>b</sup> | Chr <sup>c</sup> | bp Start <sup>c</sup> | bp End <sup>c</sup> | #SNP <sup>d</sup> | #hetSNP <sup>d</sup> |
|-----------------------------------------------|------------------------------|------------------|-----------------------|---------------------|-------------------|----------------------|
| 1                                             | CN-LOH                       | 5                | 1                     | 47700000            | 9397              | 2756                 |
| 2                                             | Loss                         | 5                | 111789971             | 112521346           | 156               | 79                   |
| 3                                             | Gain                         | 8                | 1                     | 45200000            | 12564             | 3830                 |
| 4                                             | Gain                         | 8                | 128432670             | 129207869           | 218               | 91                   |
| 5                                             | Loss                         | 9                | 1                     | 50600000            | 11201             | 3889                 |
| 6                                             | Loss                         | 10               | 84504379              | 94825178            | 1988              | 648                  |
| 7                                             | Gain                         | 12               | 1                     | 132449811           | 27131             | 8818                 |
| 8                                             | Loss                         | 13               | 31766569              | 31892852            | 37                | 10                   |
| 9                                             | CN-LOH                       | 17               | 7431864               | 11747138            | 1150              | 308                  |
| 10                                            | CN-LOH                       | 17               | 22300000              | 78774742            | 9713              | 3205                 |
| Total number of modified heterozygous SNPs    |                              |                  |                       |                     |                   | 23634                |
| Total number of heterozygous SNPs on autosome |                              |                  |                       |                     |                   | 176207               |
| Total number of SNPs on autosome              |                              |                  |                       |                     |                   | 547359               |

a: For more details, see Staaf J, et al. (2008) Genome Biology 9: R136.

b: Aberration type includes one-copy gain/loss and copy-neutral loss of heterozygosity (CN-LOH).

c: Chromosome and base pair start/end position where each simulated region is located.

d: Listed is the number of SNPs and those with heterozygous genotypes within each region.
