# Supplementary material for: Reconstructing DNA copy number by joint segmentation of multiple sequences
Source: PubMed Central journal article supplement (PMC3534631; doi:10.1186/1471-2105-13-205), 2012-08-16
Supplement: 1471-2105-13-205-S3.pdf [file 1471-2105-13-205-S3.pdf]

**Table S2. Speed comparison of three methods: GFL, BAFsegmentation and PSCN**

| Method          | Time (sec.) <sup>a</sup> |
|-----------------|--------------------------|
| GFL             | 21.97 (1.31)             |
| BAFsegmentation | 41.73 (-)                |
| PSCN            | 1154.18 (74.73)          |

a: The average time (standard deviation) required for analysis of one sample (in second).
