# Supplementary material for: Reconstructing DNA copy number by joint segmentation of multiple sequences
Source: PubMed Central journal article supplement (PMC3534631; doi:10.1186/1471-2105-13-205), 2012-08-16
Supplement: 1471-2105-13-205-S4.pdf [file 1471-2105-13-205-S4.pdf]

**Table S3. Sample information and reference CNV regions summarized for each sample by their types and sizes**

| Sample  | Gender | Ancestry              | Resource         | Type  | <10k | 10–50k | 50–100k | >100k | Total |
|---------|--------|-----------------------|------------------|-------|------|--------|---------|-------|-------|
| NA15510 | Female | European <sup>a</sup> | PDR <sup>b</sup> | loss  | 12   | 25     | 3       | 7     | 47    |
|         |        |                       |                  | gain  | 0    | 0      | 1       | 4     | 5     |
|         |        |                       |                  | total | 12   | 25     | 4       | 11    | 52    |
| NA18517 | Female | YRI                   | HapMap           | loss  | 10   | 22     | 4       | 4     | 40    |
|         |        |                       |                  | gain  | 1    | 3      | 1       | 8     | 13    |
|         |        |                       |                  | total | 11   | 25     | 5       | 12    | 53    |
| NA18576 | Female | CHB                   | HapMap           | loss  | 13   | 16     | 4       | 5     | 38    |
|         |        |                       |                  | gain  | 0    | 2      | 2       | 4     | 8     |
|         |        |                       |                  | total | 13   | 18     | 6       | 9     | 46    |
| NA18980 | Female | JPT                   | HapMap           | loss  | 8    | 16     | 1       | 4     | 29    |
|         |        |                       |                  | gain  | 0    | 0      | 1       | 3     | 4     |
|         |        |                       |                  | total | 8    | 16     | 2       | 7     | 33    |

a: The ancestry of NA15510 was not recorded but inferred in Korbel JO et al. (2007) Science 318: 420-426.

b: Abbreviation: PDR = Polymorphism Discovery Resource.
