# Supplementary material for: Reconstructing DNA copy number by joint segmentation of multiple sequences
Source: PubMed Central journal article supplement (PMC3534631; doi:10.1186/1471-2105-13-205), 2012-08-16

# Chromosome 8

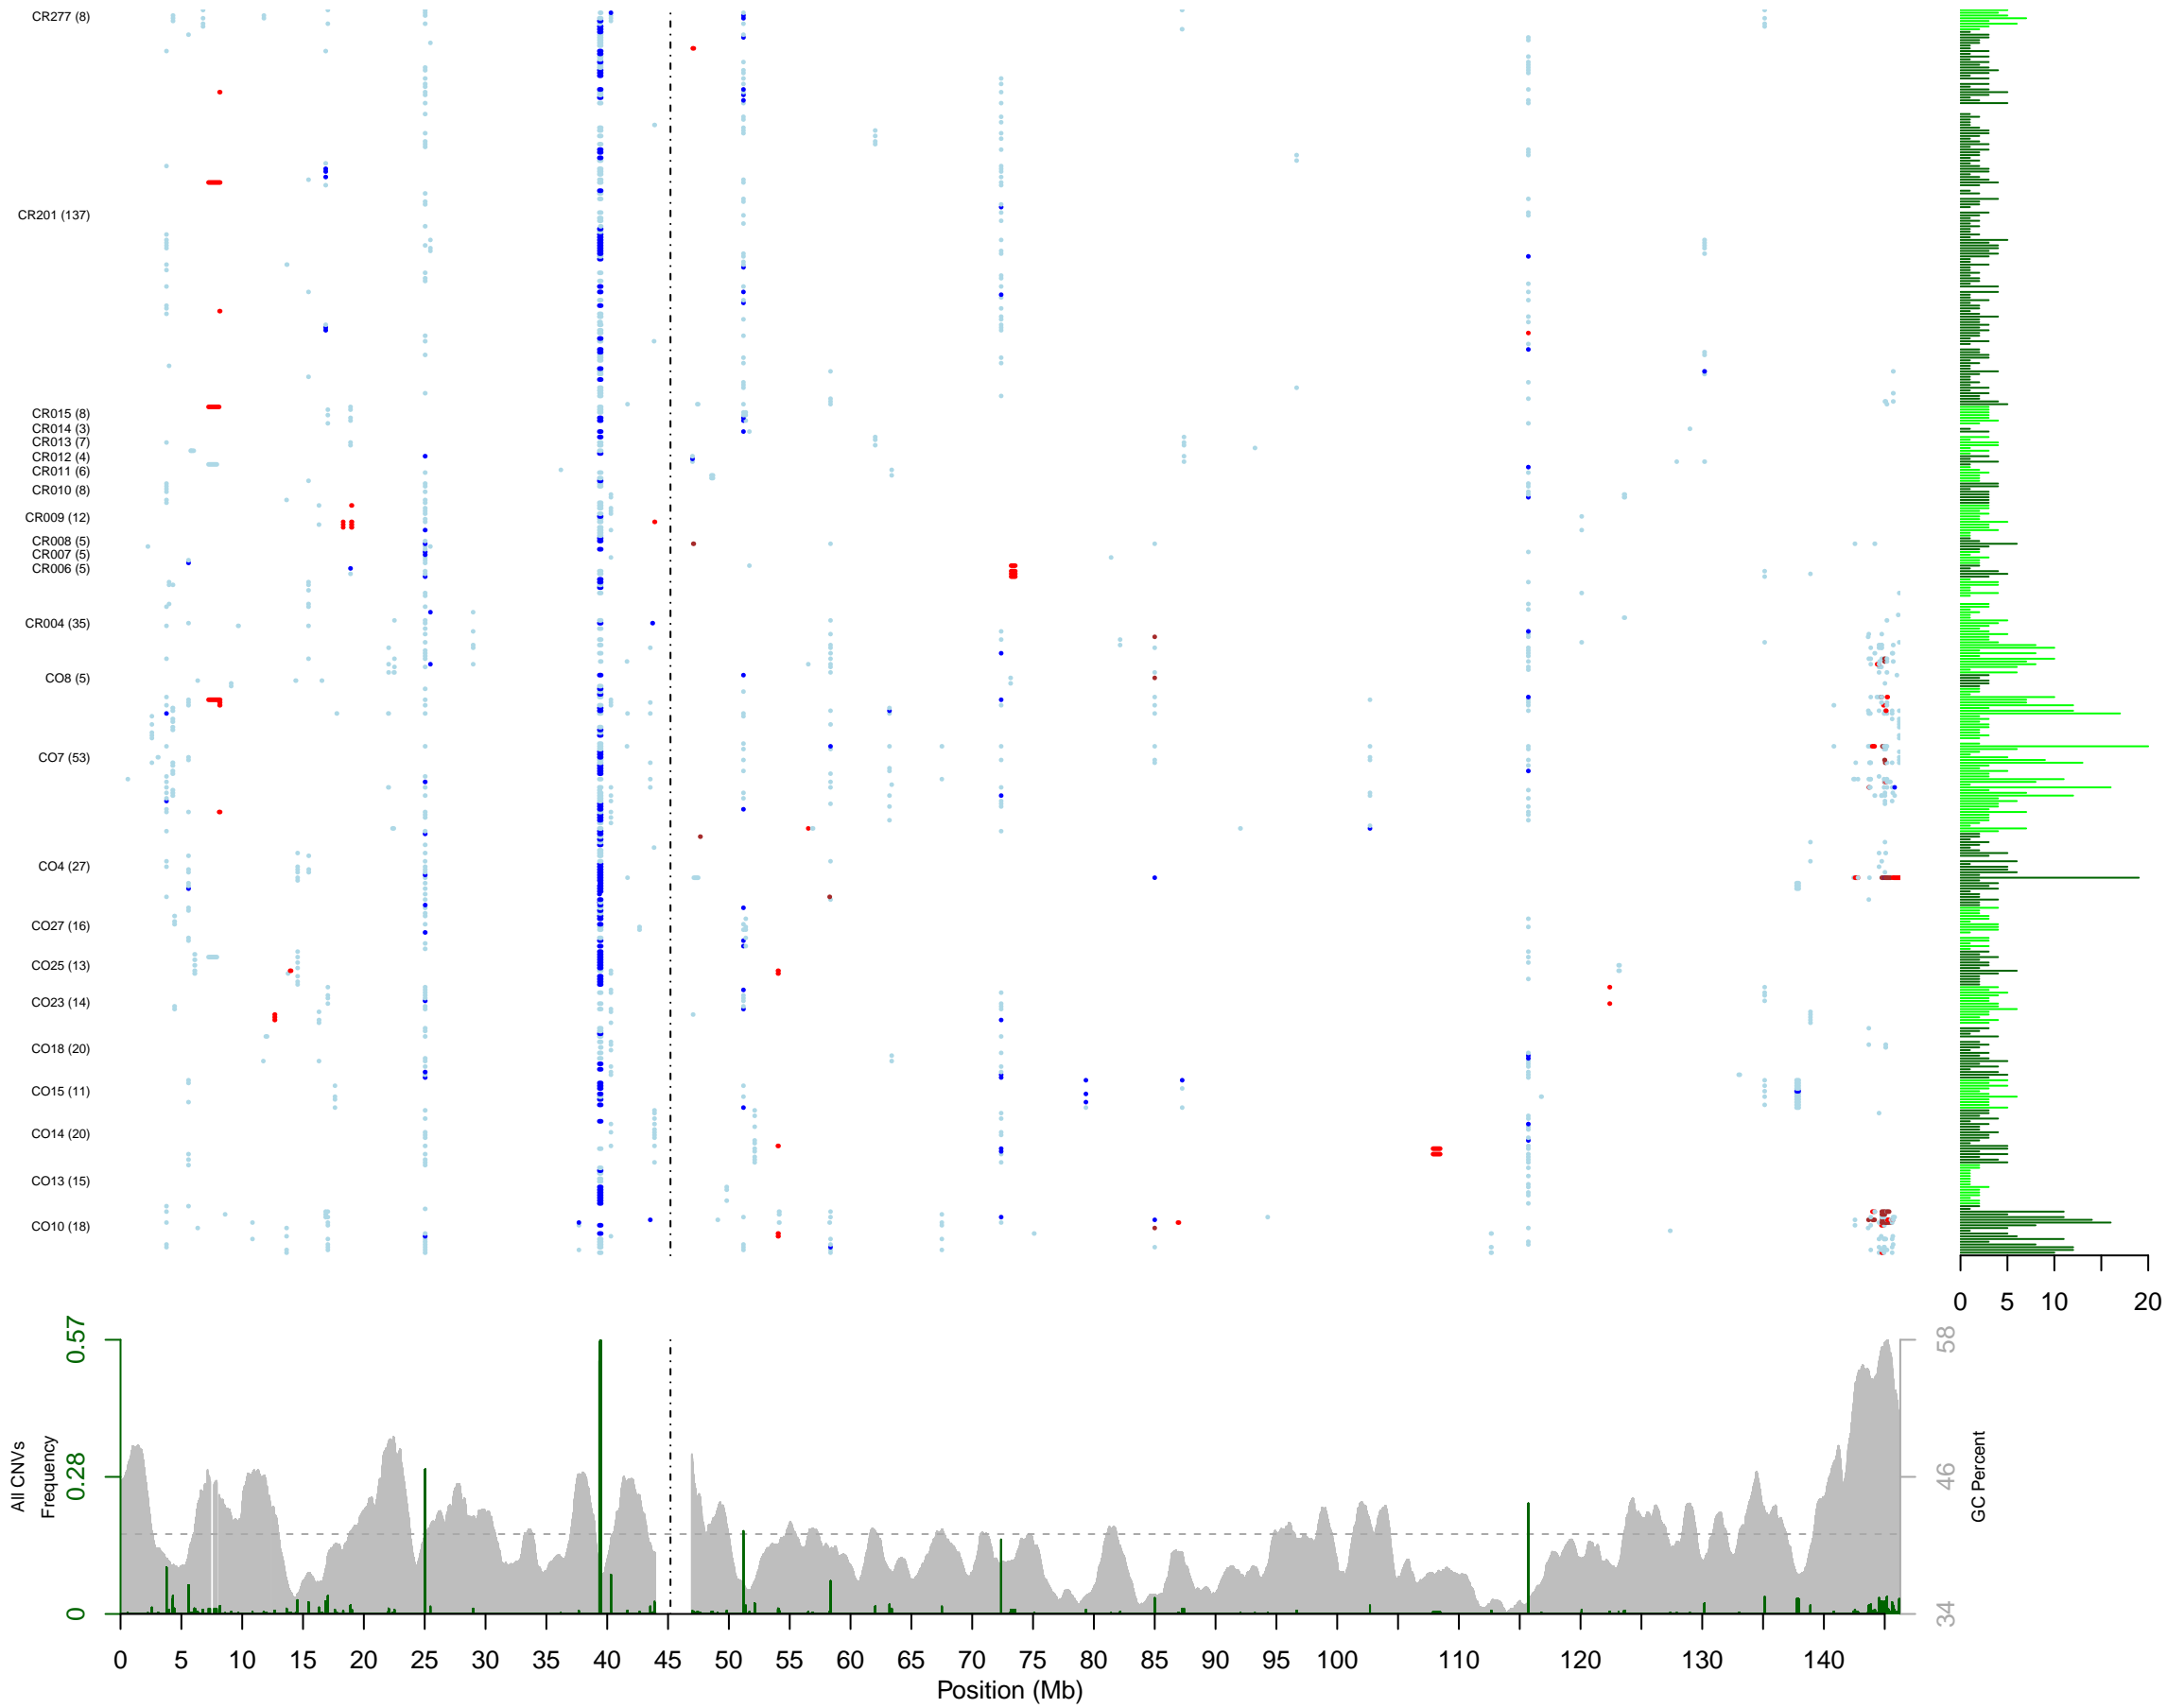

Supplement: 1471-2105-13-205-S6.pdf [file 1471-2105-13-205-S6.pdf]
